# Supplementary material for: An Alcohol‐Free SiO2 Sol‐Gel Matrix Functionalized with Acetic Acid as Drug Reservoir for the Controlled Release of Pentoxifylline
Source: Hindawi journal article supplement (doi:10.1155/2014/853967), 2014-01-01
Supplement: f1 [file 853967.f1.docx]

**Supplementary Material**

**An alcohol-free SiO2 sol-gel matrix functionalized with acetic acid as drug reservoir for the controlled release of Pentoxifylline.**

Mayra Angélica Alvarez Lemus1a*, Oscar Javier Ortiz Castañeda1b , Alma Delia Hernández2, Rosendo López González1c

1 División Académica de Ingeniería y Arquitectura, Universidad Juárez Autónoma de Tabasco, Carr. Cunduacán-Jalpa de Méndez Km. 1, Col. La Esmeralda, Cunduacán, C.P. 86690, Tabasco, México

2 Laboratorio de Microscopía Electrónica, Instituto Nacional de Rehabilitacion, Calz. México-Xochimilco 289, Col. Arenal de Guadalupe, Tlalpan, C.P. 14389, México D.F.

In order to determine TGA peaks, first derivative of the thermograms were calculated using Origin 8.6 software. The Tmax of the first weight loss occurs at 80°C which is related to desorption of water and the small amount of ethanol formed as byproduct in the sol-gel reaction, another thermal change takes place at 379°C and corresponds to the loss of surface OH groups of SiO2.

Figure S1. First derivative from TGA (DTG) analysis of PTX-SiO2.

Kinetic analysis

The zero and first order kinetic adjustment of data were performed. However due to the nature of the release profile, these mathematical models do not fit data.

Figure S2. Zero order fitting for % cumulative release vs time.

Figure S3. First order kinetics fitting of ln of non-released drug vs time.

Using Origin 8.6 software (OriginLab) we adjusted data to the LANGMUIREXT1 mathematical mode:

Eq. (S1)

The linearized equation is:

Eq (S2)

To evaluate rate constants, a graphic of t1-c/C vs t was plotted where the slope of linearized equation after fitting (lineal regression) was taken as the value of the constant. We considered two intervals of time; the first one from initial release to t=3h and the second one from 3h up to 240; calculated constants values were 2.44 s2ml/mg and 1.25 s2ml/mg respectively.
